# Supplementary material
Source: publisher site journal article supplement (https://www.dovepress.com/article/555169)
Supplement: Supplementary file 1 [file 555169%20Revised%20Supplementary%20Materials.docx]

# **SUPPLEMENTARY MATERIALS**

**Supplementary Methods**

Systematic Literature Review (SLR)

PICOs

**P**: Population: patients with rheumatoid arthritis [clinical diagnosis, meeting ACR/EULAR 2010 classification criteria1 or revised 1987 ACR criteria2] in treatment with intravenous tocilizumab

**I**: Intervention: Switching from intravenous to subcutaneous tocilizumab

**C: -**

**O**: Outcome: retention rate, efficacy and safety of subcutaneous tocilizumab during follow up

**S**: Study design: Systematic literature reviews, meta-analyses, RCTs, controlled trials, non-controlled trials, cohort studies, cross-sectional studies, case-control studies, case series.

**P**: Population: patients with rheumatoid arthritis [clinical diagnosis, meeting ACR/EULAR 2010 (1) classification criteria or revised 1987 ACR criteria (2)] in treatment with intravenous tocilizumab

**I**: Intervention: Switching from intravenous to subcutaneous tocilizumab

**C**: Control: Going on with intravenous tocilizumab

**O**: Outcome: number of patients gaining/maintaining remission or low disease activity (according to clinimetric tools) during follow up.

**S**: Study design: Systematic literature reviews, meta-analyses, RCTs, controlled trials, non-controlled trials, cohort studies, cross-sectional studies, case-control studies, case series.

**P**: Population: patients with rheumatoid arthritis [clinical diagnosis, meeting ACR/EULAR 2010 classification criteria (1) or revised 1987 ACR criteria (2)] in treatment with intravenous tocilizumab

**I**: Intervention: Switching from intravenous to subcutaneous tocilizumab

**C: -**

**O**: Outcome: efficacy of returning to intravenous formulation in those patients experiencing a disease flare after switching to subcutaneous tocilizumab

**S**: Study design: Systematic literature reviews, meta-analyses, RCTs, controlled trials, non-controlled trials, cohort studies, cross-sectional studies, case-control studies, case series.

**Keywords**

‘Rheumatoid arthritis’, ‘intravenous tocilizumab’, ‘subcutaneous tocilizumab’, ‘switch route of administration’, ‘maintenance’, ‘disease activity’, ‘efficacy’, ‘safety’.

**MeSH keywords**

‘Arthritis, rheumatoid’, ‘drug administration routes’, ‘administration, intravenous’, ‘maintenance’, ‘medication persistence’, ‘safety’.

**Search strings**

Medline via Pubmed

#1: "tocilizumab"[All Fields] OR "roactemra"[All Fields]

#2: "switch"[All Fields] OR "switched"[All Fields] OR "switches"[All Fields] OR "switching"[All Fields] OR "switchings"[All Fields]

#3: "change"[All Fields] OR "changed"[All Fields] OR "changes"[All Fields] OR "changing"[All Fields] OR "changings"[All Fields]

#4: "transit"[All Fields] OR "transited"[All Fields] OR "transiting"[All Fields] OR "transition"[All Fields] OR "transitional"[All Fields] OR "transitionals"[All Fields] OR "transitioned"[All Fields] OR "transitioning"[All Fields] OR "transitions"[All Fields] OR "transits"[All Fields]

#5: #2 OR #3 OR #4

#6: "drug administration routes"[MeSH Terms] OR "drug administration routes"[All Fields] OR "route of administration"[All Fields]

#7: "drug"[All Fields] AND "administration"[All Fields] AND "routes"[All Fields]

#8:  "route"[All Fields] AND "administration"[All Fields]

#9: #6 OR #7 OR #8

#10:  #5 AND #9

#11:"intraveneous"[All Fields] OR "intraveneously"[All Fields] OR "intravenous"[All Fields] OR "intravenously"[All Fields] OR "administration, intravenous"[MeSH Terms]

#12: "subcutaneous"[All Fields] OR "subcutaneously"[All Fields] OR "subcutanous"[All Fields]

#13: #11 AND #12

#14: #10 OR #13

#15: Arthritis, Rheumatoid[Mesh] OR arthritis, rheumatoid[All fields] OR rheumatoid arthritis[All fields]

#16: #1 AND #14 AND #15

#17: “medication persistence”[MeSH Terms] OR "persist"[All Fields] OR "persistance"[All Fields] OR "persistant"[All Fields] OR "persisted"[All Fields] OR "persistence"[All Fields] OR "persistences"[All Fields] OR "persistencies"[All Fields] OR "persistency"[All Fields] OR "persistent"[All Fields] OR "persistently"[All Fields] OR "persistents"[All Fields] OR "persister"[All Fields] OR "persisters"[All Fields] OR "persisting"[All Fields] OR "persists"[All Fields]

#18: "maintenance"[MeSH Terms] OR "maintenance"[All Fields] OR "maintenances"[All Fields]

#19: "retention"[All Fields] AND "rate"[All Fields])

#20: #17 OR #18 OR #19

#21: "efficacies"[All Fields] OR "efficacious"[All Fields] OR "efficaciously"[All Fields] OR "efficaciousness"[All Fields] OR "efficacy"[All Fields]

#22: "safety"[MeSH Terms] OR "safety"[All Fields] OR "safeties"[All Fields]

#23: #20 OR #21 OR #22

#24: #16 AND #23

Embase

#1.  'tocilizumab'/exp OR tocilizumab OR 'roactemra'/exp OR roactemra

#2.  'switch'/exp OR switch

#3.  'change'

#4.  transition

#5.  #2 OR #3 OR #4

#6.  'drug'

#7.  'administration'

#8.  route

#9.  'drug administration route'

#10. #6 AND #7 AND #8

#11. #9 OR #10

#12: #5 AND #11

#13. 'intravenous drug administration' OR ’intravenous

#14. 'subcutaneous drug administration' OR ‘subcutaneous’

#15. #13 AND #14

#16. #12 OR #15

#17. 'rheumatoid arthritis'

#18. #1 AND #16 AND #17

#19. drug AND maintenance

#20. ‘drug persistence’

#21. ‘retention rate’

#22. #19 OR #20 OR #21

#23. 'efficacy'

#24. 'safety'/exp OR safety

#25. #22 OR #23 OR #24

#26. #18 AND #25

Participants/population.

- Inclusion criteria:

- Male and female patients of all ethnic groups over 18 y/o

- Clinical diagnosis of AR

- Switched from IV to SC TCZ

- Outcome data

- Systematic literature reviews, meta-analyses, RCTs, controlled trials, non-controlled trials, cohort studies, cross-sectional studies, case-control studies, case series (>5 patients), congress abstracts (≤2 years).

- English; Italian

- Exclusion criteria:

- <18 y/o patients

- studies in animals, studies in other disease conditions different from the pre-specified ones.

**Type of studies included.**

Meta-analysis, randomized-controlled trials, cohort, case-control, case series (>5 patients), congress abstract (⩽2 years).

Studies satisfying the following exclusion criteria were not selected:

- not regarding the disease of interest;

- congress proceedings and abstracts (>2 years);

- duplicate publication;

- case reports;

- letters to the editor**.**

## **Supplementary Tables**

**Supplementary Table S1:** PRISMA 2.0 Checklist 3.

| **Topic** | **No.** | **Item** | **Location where item is reported** |
| --- | --- | --- | --- |
| **TITLE** |  |  |  |
| **Title** | 1 | Identify the report as a systematic review. | 1 |
| **ABSTRACT** |  |  |  |
| **Abstract** | 2 | See the PRISMA 2020 for Abstracts checklist | 2 |
| **INTRODUCTION** |  |  |  |
| **Rationale** | 3 | Describe the rationale for the review in the context of existing knowledge. | 4 |
| **Objectives** | 4 | Provide an explicit statement of the objective(s) or question(s) the review addresses. | 4-5, S1-2 |
| **METHODS** |  |  |  |
| **Eligibility criteria** | 5 | Specify the inclusion and exclusion criteria for the review and how studies were grouped for the syntheses. | S6 |
| **Information sources** | 6 | Specify all databases, registers, websites, organisations, reference lists and other sources searched or consulted to identify studies. Specify the date when each source was last searched or consulted. | 7 |
| **Search strategy** | 7 | Present the full search strategies for all databases, registers and websites, including any filters and limits used. | 7-8, S1-6 |
| **Selection process** | 8 | Specify the methods used to decide whether a study met the inclusion criteria of the review, including how many reviewers screened each record and each report retrieved, whether they worked independently, and if applicable, details of automation tools used in the process. | 7-8, S6 |
| **Data collection process** | 9 | Specify the methods used to collect data from reports, including how many reviewers collected data from each report, whether they worked independently, any processes for obtaining or confirming data from study investigators, and if applicable, details of automation tools used in the process. | 8 |
| **Data items** | 10a | List and define all outcomes for which data were sought. Specify whether all results that were compatible with each outcome domain in each study were sought (e.g. for all measures, time points, analyses), and if not, the methods used to decide which results to collect. | 7 |
|  | 10b | List and define all other variables for which data were sought (e.g. participant and intervention characteristics, funding sources). Describe any assumptions made about any missing or unclear information. | 7-8 |
| **Study risk of bias assessment** | 11 | Specify the methods used to assess risk of bias in the included studies, including details of the tool(s) used, how many reviewers assessed each study and whether they worked independently, and if applicable, details of automation tools used in the process. | 8 |
| **Effect measures** | 12 | Specify for each outcome the effect measure(s) (e.g. risk ratio, mean difference) used in the synthesis or presentation of results. | 7 |
| **Synthesis methods** | 13a | Describe the processes used to decide which studies were eligible for each synthesis (e.g. tabulating the study intervention characteristics and comparing against the planned groups for each synthesis (item 5)). | 8 |
|  | 13b | Describe any methods required to prepare the data for presentation or synthesis, such as handling of missing summary statistics, or data conversions. | 8 |
| 13c | Describe any methods used to tabulate or visually display results of individual studies and syntheses. | 8 |
| 13d | Describe any methods used to synthesize results and provide a rationale for the choice(s). If meta-analysis was performed, describe the model(s), method(s) to identify the presence and extent of statistical heterogeneity, and software package(s) used. | 8 |
| 13e | Describe any methods used to explore possible causes of heterogeneity among study results (e.g. subgroup analysis, meta-regression). | na |
| 13f | Describe any sensitivity analyses conducted to assess robustness of the synthesized results. | na |
| **Reporting bias assessment** | 14 | Describe any methods used to assess risk of bias due to missing results in a synthesis (arising from reporting biases). | 10 |
| **Certainty assessment** | 15 | Describe any methods used to assess certainty (or confidence) in the body of evidence for an outcome. | na |
| **RESULTS** |  |  |  |
| **Study selection** | 16a | Describe the results of the search and selection process, from the number of records identified in the search to the number of studies included in the review, ideally using a flow diagram. | 11 |
|  | 16b | Cite studies that might appear to meet the inclusion criteria, but which were excluded, and explain why they were excluded. | Figure 3 |
| **Study characteristics** | 17 | Cite each included study and present its characteristics. | S. tables S3, S4, S5 |
| **Risk of bias in studies** | 18 | Present assessments of risk of bias for each included study. | 11 |
| **Results of individual studies** | 19 | For all outcomes, present, for each study: (a) summary statistics for each group (where appropriate) and (b) an effect estimate and its precision (e.g. confidence/credible interval), ideally using structured tables or plots. | S. tables S3, S4, S5 |
| **Results of syntheses** | 20a | For each synthesis, briefly summarize the characteristics and risk of bias among contributing studies. | Box 2 |
|  | 20b | Present results of all statistical syntheses conducted. If meta-analysis was done, present for each the summary estimate and its precision (e.g. confidence/credible interval) and measures of statistical heterogeneity. If comparing groups, describe the direction of the effect. | S. tables S3, S4, S5 |
| 20c | Present results of all investigations of possible causes of heterogeneity among study results. | 11 |
| 20d | Present results of all sensitivity analyses conducted to assess the robustness of the synthesized results. | na |
| **Reporting biases** | 21 | Present assessments of risk of bias due to missing results (arising from reporting biases) for each synthesis assessed. | 11 |
| **Certainty of evidence** | 22 | Present assessments of certainty (or confidence) in the body of evidence for each outcome assessed. | na |
| **DISCUSSION** |  |  |  |
| **Discussion** | 23a | Provide a general interpretation of the results in the context of other evidence. | 13-17 |
|  | 23b | Discuss any limitations of the evidence included in the review. | 16 |
| 23c | Discuss any limitations of the review processes used. | 16 |
| 23d | Discuss implications of the results for practice, policy, and future research. | 16-17 |
| **OTHER INFORMATION** |  |  |  |
| **Registration and protocol** | 24a | Provide registration information for the review, including register name and registration number, or state that the review was not registered. | 11 |
|  | 24b | Indicate where the review protocol can be accessed, or state that a protocol was not prepared. | 11 |
| 24c | Describe and explain any amendments to information provided at registration or in the protocol. | na |
| **Support** | 25 | Describe sources of financial or non-financial support for the review, and the role of the funders or sponsors in the review. | 19 |
| **Competing interests** | 26 | Declare any competing interests of review authors. | 19 |
| **Availability of data, code and other materials** | 27 | Report which of the following are publicly available and where they can be found: template data collection forms; data extracted from included studies; data used for all analyses; analytic code; any other materials used in the review. | 20 |

na: not applicable; S.: supplementary.

**Supplementary Table S2:** Univariable logistic regression analysis for association between baseline characteristics (independent variables) and the likelihood of switching back to IV-TCZ (dependent variable).

| **Independent variable** | | **No** | **Yes** | **OR** |
| --- | --- | --- | --- | --- |
| Age (years) | mean (SD) | 55.1 (17.5) | 60.2 (15.5) | 1.02 (0.97-1.07, p 0.393) |
| Sex, n (%) | F | 9 (37.5) | 15 (62.5) | - |
| M | 4 (66.7) | 2 (33.3) | 0.30 (0.04-1.86, p 0.211) |
| BMI (kg/m2) | mean (SD) | 25.6 (6.1) | 28.7 (7.1) | 1.08 (0.96-1.24, p 0.239) |
| Smoking habitude, n (%) | No | 10 (43.5) | 13 (56.5) | - |
| Yes | 2 (33.3) | 4 (66.7) | 1.54 (0.25-12.75, p 0.655) |
| Disease duration (years) | mean (SD) | 17.2 (6.5) | 17.6 (9.6) | 1.01 (0.92-1.10, p 0.895) |
| Previous bDMARD(s), n (%) | No | 4 (30.8) | 9 (69.2) | - |
| Yes | 9 (52.9) | 8 (47.1) | 0.40 (0.08-1.73, p 0.229) |
| ACPA, n (%) | No | 7 (50.0) | 7 (50.0) | - |
| Yes | 6 (40.0) | 9 (60.0) | 1.50 (0.34-6.77, p 0.589) |
| Hands/Feet erosions (radiographs), n (%) | No | 7 (46.7) | 8 (53.3) | - |
| Yes | 6 (40.0) | 9 (60.0) | 1.31 (0.31-5.75, p 0.713) |
| Fibromyalgia, n (%) | No | 11 (52.4) | 10 (47.6) | - |
| Yes | 2 (22.2) | 7 (77.8) | 3.85 (0.72-30.16, p 0.140) |
| Reason for *switch* | Lack of IV-TCZ (COVID-19 pandemics) | 4 (20.0) | 16 (80.0) | - |
| **Personal preference** | **9 (90.0)** | **1 (10.0)** | **0.03 (0.00-0.21, p 0.003)** |
| IV-TCZ therapy duration (months) | mean (SD) | 63.0 (49.6) | 59.5 (44.0) | 1.00 (0.98-1.01, p 0.832) |
| IV-TCZ dose (mg/kg) | mean (SD) | 8.1 (0.3) | 7.4 (1.1) | 0.16 (0.01-0.73, p 0.064) |
| Concomitant csDMARD, n (%) | No | 11 (50.0) | 11 (50.0) | - |
| Yes | 2 (25.0) | 6 (75.0) | 3.00 (0.55-23.69, p 0.233) |
| Concomitant GC, n (%) | No | 5 (35.7) | 9 (64.3) | - |
| Yes | 8 (50.0) | 8 (50.0) | 0.56 (0.12-2.38, p 0.433) |
| T0 DAS28 | mean (SD) | 1.6 (1.4) | 2.3 (1.1) | 1.62 (0.88-3.35, p 0.145) |
| **T0 GH (NRS 0-100)** | **mean (SD)** | **25.4 (23.3)** | **44.1 (19.1)** | **1.05 (1.01-1.10, p 0.034)** |
| T0 TJC | mean (SD) | 1.0 (2.3) | 1.5 (1.9) | 1.13 (0.78-1.75, p 0.531) |
| T0 SJC | mean (SD) | 1.2 (2.2) | 0.8 (1.2) | 0.89 (0.53-1.40, p 0.596) |
| T0 ESR (mm/h) | mean (SD) | 4.4 (5.0) | 6.2 (6.0) | 1.07 (0.93-1.30, p 0.389) |

Abbreviations: Anti-CCP; anti-cyclic citrullinated peptides; BMI: body mass index; DAS28: disease activity score on 28 joint; DMARD: disease modifying anti-rheumatic drug (b: biologic; cs: conventional synthetic); ESR: erythrocyte sedimentation rate; GC: glucocorticoid; GH: global health; IV: intravenous; NRS: numeric rating scale; OR: odds ratio; SC: subcutaneous; SD: standard deviation; SJ: swollen joint count; TCZ: tocilizumab; TJC: tender joint count. Bold text within a row highlights statistically significant results.

**Supplementary Table S3:** Summary of studies including patients switched from IV to SC TCZ; subgroups compared based on switch success.

| **Study** | **Ahn SM, 2022** 4 | **Cáceres VA, 2022** 5 | **Daood R, 2023**6 |
| --- | --- | --- | --- |
| **Study Design** | Observational, retrospective | Observational, retrospective | Observational, retrospective |
| **Location** | South Korea | Spain | Israel |
| **Months of follow-up per patient (observation periods, years)** | 6 (2013-2020) | 12 (2020-2021) | First 2 visits after switch (2020) |
| **Number of RA patients (total patients)** | 37 (37) | 28 (55) | 30 (37) |
| **Exclusion Criteria** | IV-TCZ for <6 months, not achieving DAS28-ESR ≤3.2 with IV-TCZ | Lack of informed consent | Active infections |
| **SC-TCZ dose (mg/week)** | 81.5 | 162 | 81.5 |
| **Significantly different baseline characteristics between success and failure groups** | Mean (SD) IV-TCZ dose (mg/kg): 8.2 (0.3) vs 7.7 (0.5);  number of patients on concomitant MTX: 5/11 vs 22/26 | Monotherapy: 10/11 vs 8/17 | Any |
| **Time to primary outcome, mean (months)** | 3.2 | 12 | 3.5 |
| **Primary outcome** | Flare incidence (DAS28-ESR increase >1.2) within 6 months of switching to SC-TCZ | Rate and reasons for returning to IV-TCZ | Clinical efficacy and patient satisfaction with SC-TCZ |
| **Results (based on primary outcome)** | 11/37 (29.7%) | 11 (39.3%): ineffectiveness 5 (45.5%), personal preference 3 (27.3%), headache/ ISR/difficulty with SC 1 (9.1) each | 21/30 (70.0%) relapses |
| **DAS28 baseline-follow up, mean (SD)** | | | |
| **Success group** | 2.2 (0.6) - 1.7 | nr | nr |
| **Failure group** | 2.5 (0.6) - 5.0 | nr | nr |
| **Patients who successfully returned to IV-TCZ, n (%)** | 8/11 (88.9%) | 11/11 (100%) | nr |
| **Factors significantly associated with primary outcome** | IV-TCZ dose (OR, 20.7; 95%CI, 2.2-192.8; p=0.008);  non-concomitant MTX (OR, 8.5; 95%CI, 1.2-60.4; p=0.03) | No | nr |
| **Other Outcomes** | No | No | No |
| **SC-TCZ maintenance or retention rate** | 70.3% | 60.7% | 30.0% |
| **Incidence of AEs [SAEs]** | nr | nr | 30.7% (5/26 skin reactions, 1/26 transaminase elevation, 1/26 arthrocentesis, 1/26 hospitalization for steroid boluses) |
| **Reason for switch** | nr | COVID pandemic context | COVID pandemic context |

Abbreviations: AE: adverse event; DAS28: Disease activity score on 28 joints; ESR: erythrocyte sedimentation rate; IV: intravenous; MTX: methotrexate; nr: not reported; np: not applicable; RA: rheumatoid arthritis; SAE: severe AE; SC: subcutaneous; SD: standard deviation; TCZ: tocilizumab.

**Supplementary Table S4.** Summary of studies comparing IV-to-SC switchers with IV-to-IV patients.

| **Study** | **Burmester GR, 2015** 7 | **Darloy J, 2019** 8 | **Larid G, 2022** 9 | **Lauper, 2018** 10 |
| --- | --- | --- | --- | --- |
| **Study Design** | Open-label RCT, prospective | Cohort, retrospective | Observational, retrospective | Observational, retrospective |
| **Location** | Worldwide | France | France | Europe |
| **Months of follow-up per patient (observation periods, years)** | 18 (2011-2014) | 12 (2015-2016) | 6 (2015-2016) | 108 (2009-2018) |
| **Number of RA patients (total)** | | | | |
| **IV-to-SC** | 186 | 94 | 76 | 274 |
| **IV-to-IV** | 372 | 220 | 124 | 2140 |
| **Exclusion Criteria** | See SUMMACTA protocol, double-dummy phase | Lack of informed consent | nr | nr |
| **SC-TCZ dose (mg/week)** | 162 | 162 | nr | 81.5 (majority) |
| **IV-TCZ dose (mg/kg/month)** | 8 | 7 | 8 (67% of patients) | 8 (majority) |
| **Baseline characteristics significantly different between groups** | | | | |
| **IV-to-SC** | Anti-CCP+ 153 (83.2%); RF+ 145 (78.4%); TNFi-non-responder 31 (16.7%) | No | No | No |
| **IV-to-IV** | Anti-CCP+ 276 (75%); RF+ 273 (74%); TNFi-non-responder 87 (23.4%) | No | No | No |
| **Time to primary outcome, mean (months)** | 18 | 6 | 9 | End of study and 12 (respectively, for co-primary outcomes) |
| **Primary outcome** | Efficacy (proportion of patients in DAS28/CDAI/ Boolean remission, DAS28 LDA, HAQ-DI response) and long-term safety (AE [SAE] incidence) of SC-TCZ | Proportion of patients with persistent DAS28 <3.2 or improving disease activity 6 months after switch | Efficacy, persistence, safety, SC-TCZ dose changes after switch; characteristics of IV-to-SC patients | TCZ retention and efficacy (CDAI) |
| **Results (based on primary outcome)** | DAS28-REM: 91/186 (55.6%) vs 142/372 (46.4%) | 66 (73.3%) vs 137 (70.3%) (baseline: 81.9% and 59.5%, respectively) | DAS28 ≤3.2*: 29/34 (85%); +29 mg/week | CDAI IV-to-SC: 30.7 (19.4-41.0) (Bsl) - 8.0 (3.0-15.4) (switch) - 5.8 (2.9-9.4) (last).  CDAI IV-only 25.0 (14-36.5)(Bsl) - 8.5 (3-18.0)(last).  See below for Rr. |
| **DAS28 baseline-follow up, mean (SD)** | | | | |
| IV-to-SC | 6.7 (1.0) - nr | 2.1 (1.1) - 1.7 (0.9) | 1.40 (0.9) - 1.36 (1.19) | nr |
| IV-to-IV | 6.6 (1.0) - nr | 2.95 (1.6) - 2.5 (1.3) | 1.6 (1.1) - nr | nr |
| **Factors significantly associated with primary outcome** | No | No | No | No |
| **Other significant outcomes** | ISR rate: 93.45/100 PY (IV-to-SC) vs 33.63/100 PY (IV-to-IV) | No | Higher probability of physician not proposing switch if male patient, overweight, on steroid therapy (p<0.05, <0.05, <0.001 respectively) | HR of discontinuation in IV-to-Sc group vs IV-only group: 0.65 (95%CI 0.56 - 0.76) |
| **SC-TCZ maintenance or retention rate** | nr | 77.7% (95% CI 67.8 - 84.8%) | 85.0% | 7.94 years, 95%CI 6.96 to NA** (vs 3.12 years, 95%CI 2.76-3.47 in IV-only) |
| **Incidence of AEs [SAEs]** | | | | |
| IV-to-SC | 394.92/100 PY, of which 96.97/100 PY were infections [19.55/100 PY, of which 6.65/100 PY were infections] | 8.5% | 10/76 (13.15%) [4/76 (5.26%)] | nr |
| IV-to-IV | 408.56/100 PY, of which 105.57/100 PY were infections [15.43/100 PY, of which 3.92/100 PY were infections] | 9.1% | nr | nr |
| **Reason for switch** | Per protocol | Shared decision | Shared decision | nr |

*DAS28 available only for 34 patients.

**the upper endpoint of the 95% CI never reaching 50% of discontinuation

Abbreviations: Anti-CCP: anti-cyclic citrullinated peptides; AE: adverse event; Bsl: baseline; DAS28: Disease activity score on 28 joints; Δ: delta; IV: intravenous; HR: hazard ratio; L/M/H-DA: low/moderate/high disease activity; nr: not reported; NA: not applicable; RA: rheumatoid arthritis; RCT: randomized controlled trial; REM: remission; RF: rheumatoid factor; Rr: retention rate; SAE: severe AE; SC: subcutaneous; SD: standard deviation; TCZ: tocilizumab; TNFi: Tumor necrosis factor α inhibitor.

**Supplementary Table S5.** Summary of studies comparing IV-to-SC switchers with SC-TCZ group or no group.

| **Study** | **Atsumi T, 2018** 11 | **Iwamoto N, 2016** 12 | **Ogata A, 2015** 13 | **Rodríguez FL, 2022** 14 | **Stojanović S, 2021** 15 |
| --- | --- | --- | --- | --- | --- |
| **Study Design** | Observational, prospective | Observational, retrospective | Open-label RCT, prospective | Observational, retrospective (Congress Abstract) | Observational, cross-sectional |
| **Location** | Japan | Japan | Japan | Spain | Serbia |
| **Months of follow-up per patient (observation periods, years)** | 6 (ns) | 6 (2013-2014) | 21 (2010-2015) | 12 (2020-2021) | np (likely 2020-2021) |
| **Number of RA patients (total)** | 1003 (1003) | 58 (58) | 319 (319) | 16* (32) | 47 (47) |
| **Comparison group, number of patients** | SC-TCZ naïve, 784 | No | SC-to-SC, 159 | No | No |
| **Exclusion criteria** | Contraindications to SC-TCZ according to product label | Lack of informed consent | Lack of informed consent | nr | Lack of informed consent |
| **SC-TCZ Dose (mg/week)** | 81.5 | 81.5 | 81.5 | nr | 162 |
| **Baseline characteristics significantly different between groups** | No | np | np | np | np |
| **Time to primary outcome, mean (months)** | 6 | 3 | 3 | nr | 6 |
| **Primary outcome** | Incidence of AEs [SAEs] with SC-TCZ and changes in DAS28-ESR or CDAI | Efficacy of switch and impact of BMI on it | Efficacy and safety of SC-TCZ | Efficacy and safety of IV-to-SC switch | Efficacy and impact on QoL of TCZ, particularly after IV-to-SC switch |
| **Results (based on primary outcome)** | 78.8/100 PY, of which 11.1/100 PY were infections [10.1/100 PY, of which 0 were infections] | Δ -0.14 (0.8) | Patients in REM/LDA: 132/160 (baseline), 127/160 (stable those in REM). 9/28 patients with baseline DAS28 >3.2 reach REM/LDA; 14/132 patients in REM/LDA at baseline worse to MDA/HDA | 20% lose efficacy with switch; safety similar to other studies | Δ DAS28 +0.02 (p>0.05) |
| **DAS28 baseline-follow up, mean (SD)** | | | | | |
| **IV-to-SC** | 2.2 (1.3) - 2.1 (1.2) | 2.3 (1.1) - 2.1 (nr) | 6.2 (0.9) - 2.6 (1.2) | nr | 2.44 - 2.46 |
| **Other group** | nr | np | 6.1 (0.9) - 2.6 (1.4) | np | np |
| **Patients who successfully returned to SC-TCZ, n (%)** | nr | nr | np | 4/5 (80.0%) | nr |
| **Factors significantly associated with primary outcome** | No | No | Weight >70 kg: reduction in TCZ trough concentration in IV-to-SC patients | np | No |
| **Other significant outcomes** | No | Improvement in Δ DAS28 in lighter groups vs worsening in heavier groups (p > .05) | Patients >70 kg in clinical remission move from 8/11 to 3/11; in BMI >25 kg/m² group, from 66.7% (14/21) to 42.9% (9/21) | np | CDAI from 7.51 to 5.06 (p<0.05) |
| **SC-TCZ maintenance or retention rate** | 84.2% | 96.55% | 98.8% | 83.3% | 100% |
| **Incidence of AEs [SAEs]** | See primary outcome | 1.7% | 95/160 (59.4%) [7/160 (4.4%)] | 2/32, 6.25% (not specifying how many of the 2 were JIA) | "[…] no ADR which would cause TCZ withdrawal" |
| **Reasons for switch** | Shared decision | Shared decision | Per protocol | COVID-19 pandemic context | Medical decision, COVID-19 pandemic context |

*The authors of this study explained RA patients were 49% of the entire population.

Abbreviations: AE: adverse event; ADR: adverse drug reaction; DAS28: Disease activity score on 28 joints; Δ: delta; IV: intravenous; JIA: juvenile idiopathic arthritis; L/M/H-DA: low/moderate/high disease activity; nr: not reported; np: not applicable; QoL: quality of life; RA: rheumatoid arthritis; REM: remission; SAE: severe AE; SC: subcutaneous; SD: standard deviation; TCZ: tocilizumab.

**Supplementary Figures**

**
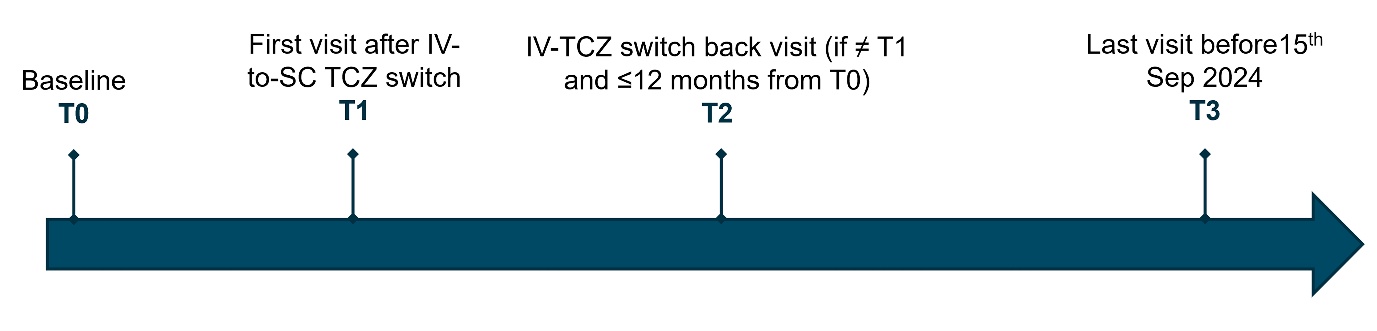
**

**Supplementary Figure S1:** Relevant timelines of the observational, retrospective cohort study (Ferrara cohort).

**
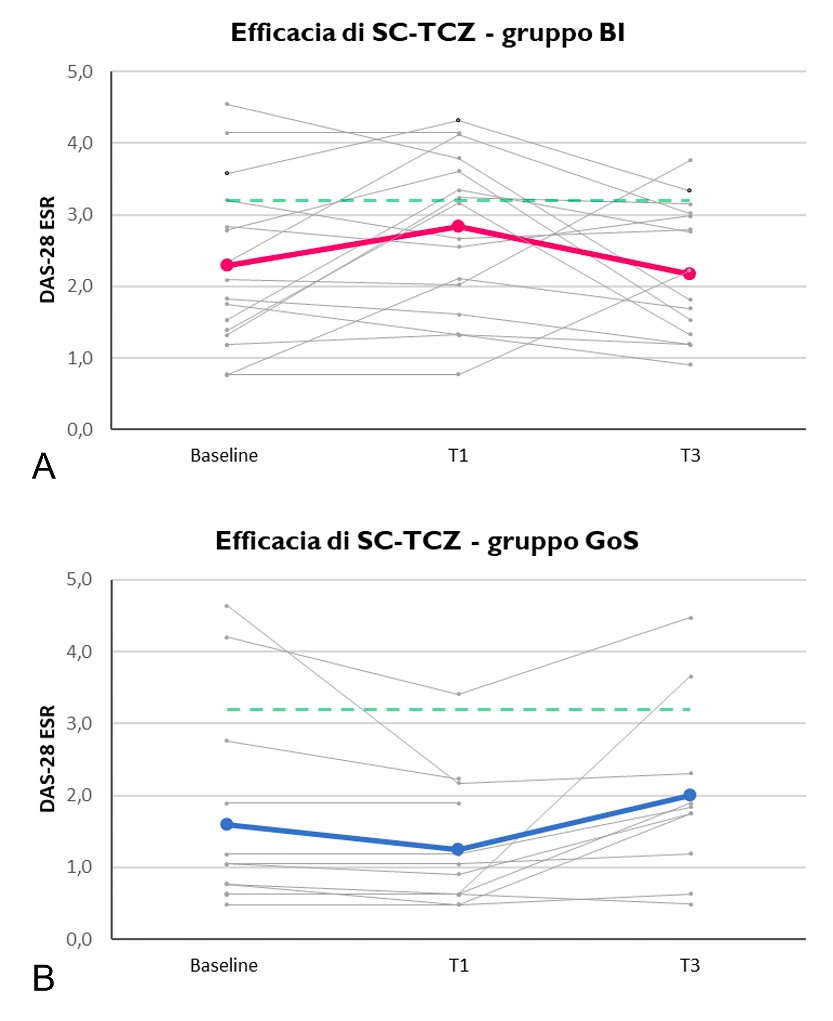
**

**Supplementary Figure S2:** DAS28 modifications in GoS (A) and BI (B) groups during the follow-up (Ferrara cohort).

## **Bibliography**

1. Aletaha D, Neogi T, Silman AJ. 2010 Rheumatoid arthritis classification criteria: An American College of Rheumatology/European League Against Rheumatism collaborative initiative. doi:10.1002/art.27584

2. Arnett FC, Edworthy SM, Bloch DA, et al. The American Rheumatism Association 1987 revised criteria for the classification of rheumatoid arthritis. *Arthritis Rheum*. 1988;31(3):315-324. doi:10.1002/art.1780310302

3. Page MJ, McKenzie JE, Bossuyt PM, et al. The PRISMA 2020 statement: an updated guideline for reporting systematic reviews. *BMJ*. 2021;372:n71. doi:10.1136/bmj.n71

4. Ahn SM, Oh JS, Heo HM, et al. Predictive Factors for Rheumatoid Arthritis Flare After Switching From Intravenous to Subcutaneous Formulation of Tocilizumab in Real-World Practice. *J Korean Med Sci*. 2022;37(17):e138. doi:10.3346/jkms.2022.37.e138

5. Cáceres VA, Piñeiro ML, Ibáñez-Beróiz B, Enguita-Germán M. Mass Switch from Intravenous to Subcutaneous Tocilizumab in Rheumatic Diseases during the SARS-COV-2 Pandemic. *J Clin Rheumatol*. 2022;28(7):346-348. doi:10.1097/RHU.0000000000001862

6. Daood R, Toledano K, Markovits D, et al. Switching from intravenous tocilizumab to subcutaneous administration during the COVID-19 pandemic: impact on treatment efficacy and patient satisfaction. *Clin Exp Rheumatol*. 2023;41(3):744-746. doi:10.55563/clinexprheumatol/lxfy2v

7. Burmester GR, Rubbert-Roth A, Cantagrel A, et al. A randomised, double-blind, parallel-group study of the safety and efficacy of subcutaneous tocilizumab versus intravenous tocilizumab in combination with traditional disease-modifying antirheumatic drugs in patients with moderate to severe rheumatoid arthritis (SUMMACTA study). *Ann Rheum Dis*. 2014;73(1):69-74. doi:10.1136/annrheumdis-2013-203523

8. Darloy J, Segaud N, Salmon JH, et al. Tocilizumab Effectiveness After Switching from Intravenous to Subcutaneous Route in Patients with Rheumatoid Arthritis: The RoSwitch Study. *Rheumatol Ther*. 2019;6(1):61-75. doi:10.1007/s40744-018-0138-y

9. Larid G, Joffres L, Ricard E, et al. Stable efficacy and safety after switching from intravenous to subcutaneous tocilizumab in a cohort of 200 patients in real life conditions. *Joint Bone Spine*. 2022;89(4). doi:10.1016/j.jbspin.2022.105347

10. Lauper K, Santos MJ, Ianonne F, et al. Comparative effectiveness of subcutaneous versus intravenous tocilizumab in a paneuropean collaboration of registries. *Ann Rheum Dis*. 2018;77((Lauper K.; Courvoisier D.S.; Gabay C.) Rheumatology, University Hospitals of Geneva, Geneva, Switzerland):606. doi:10.1136/annrheumdis-2018-eular.2886

11. Atsumi T, Fujio K, Yamaoka K, Tomobe M, Kuroyanagi K, Kameda H. Safety and effectiveness of subcutaneous tocilizumab in patients with rheumatoid arthritis in a real-world clinical setting. *Mod Rheumatol*. 2018;28(5):780-788. doi:10.1080/14397595.2017.1416760

12. Iwamoto N, Fukui S, Umeda M, et al. Evaluation of switching from intravenous to subcutaneous formulation of tocilizumab in patients with rheumatoid arthritis. *Mod Rheumatol*. 2016;26(5):662-666. doi:10.3109/14397595.2015.1129692

13. Ogata A, Tanimura K, Sugimoto T, et al. Phase III study of the efficacy and safety of subcutaneous versus intravenous tocilizumab monotherapy in patients with rheumatoid arthritis. *Arthritis Care Res*. 2014;66(3):344-354. doi:10.1002/acr.22110

14. Rodríguez de Francisco L, Acosta García HL, Fernández González M, Soriano Martínez M, Ciudad Gutierrez P. EVALUATION OF THE EFFECTIVENESS AND SAFETY OF SWITCHING FROM INTRAVENOUS TO SUBCUTANEOUS TOCILIZUMAB. *Eur J Hosp Pharm*. 2022;29(SUPPL 1):A115. doi:10.1136/ejhpharm-2022-eahp.240

15. Stojanović S, Stamenković B, Nedović J, Aleksić I, Cvetković J. Effectiveness of tocilizumab after switching from intravenous to subcutaneous formulation in patients with rheumatoid arthritis: A single-centre experience. *Acta Fac Medicae Naissensis*. 2021;38(3):247-257. doi:10.5937/afmnai38-31264
